# Supplementary material for: XModeScore: a novel method for accurate protonation/tautomer-state determination using quantum-mechanically driven macromolecular X-ray crystallographic refinement
Source: PubMed Central journal article supplement (PMC4822566; doi:10.1107/s2059798316002837), 2016-03-30
Supplement: d-72-00586-sup1.pdf [file d-72-00586-sup1.pdf]

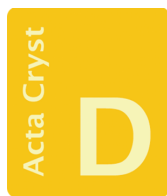

STRUCTURAL  
BIOLOGY

**Volume 72 (2016)**

**Supporting information for article:**

***XModeScore*: a novel method for accurate protonation/tautomer-state determination using quantum-mechanically driven macromolecular X-ray crystallographic refinement**

**Oleg Borbulevych, Roger I. Martin, Ian J. Tickle and Lance M. Westerhoff**

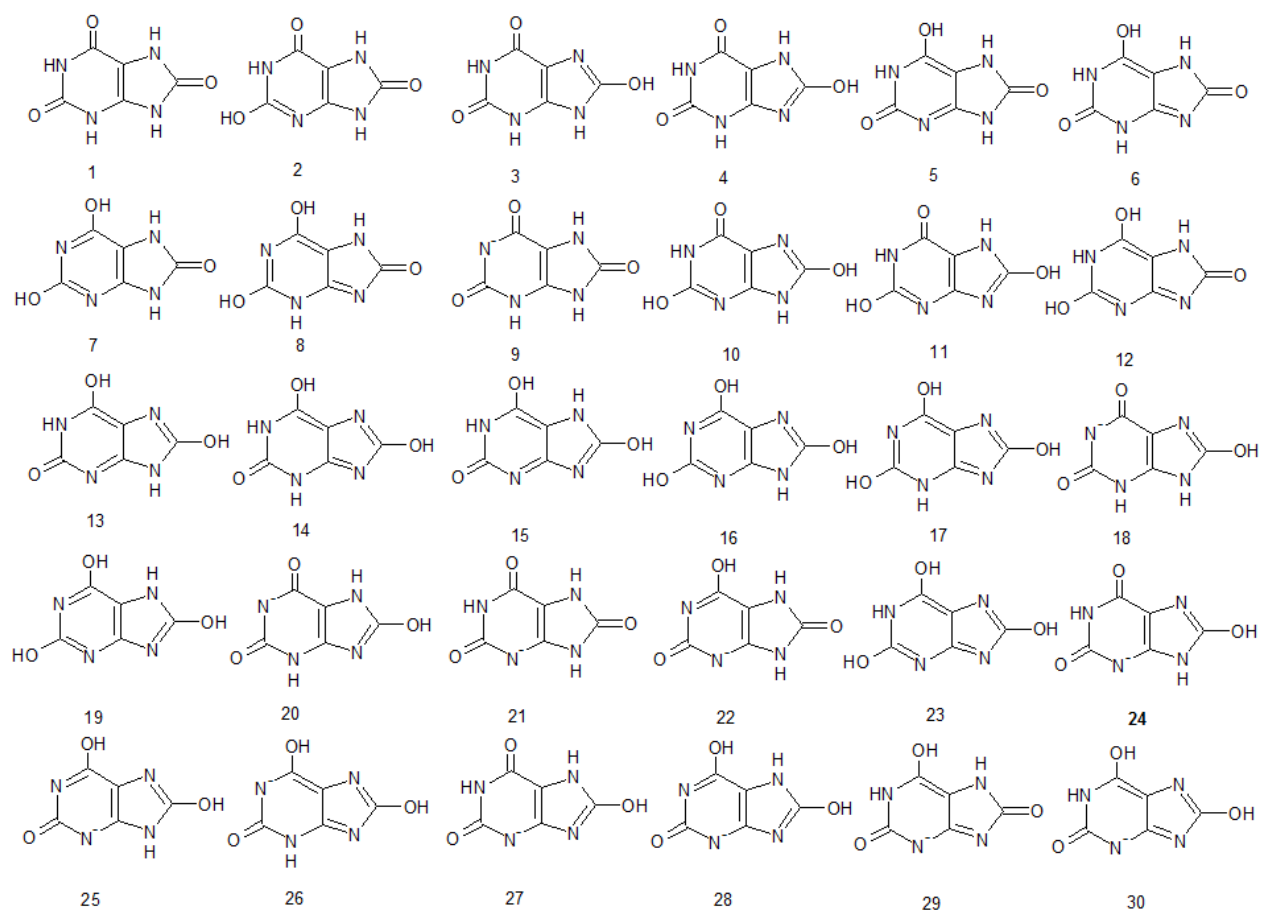

**Figure S1** Possible tautomeric/protonation states of the ligand 8HX included in XModeScore scoring.

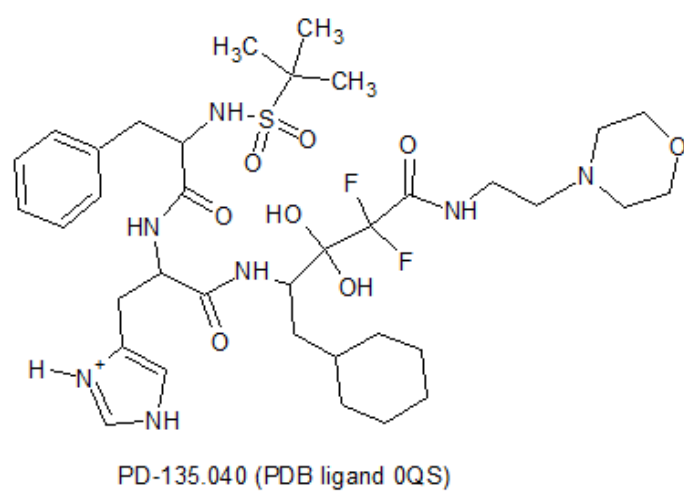

**Figure S2** Structure of the inhibitor PD-135040 (PDB ligand 0QS).

**Table S1** Scoring results for possible tautomeric structures of the ligand AZM in PDB 4K0S

| <u>Structure- 4K0S</u>  | <u>SE</u>   | <u>RSCC</u>  | <u>ZDD</u>  | <u>XModeScore</u> |
|-------------------------|-------------|--------------|-------------|-------------------|
| <b>3</b>                | <b>5.16</b> | <b>0.987</b> | <b>4.88</b> | <b>2.75</b>       |
| 2                       | 8.95        | 0.985        | 5.88        | -0.82             |
| 1                       | 9.69        | 0.984        | 6.33        | -1.93             |
| <br>                    |             |              |             |                   |
| <u>Resolution 2.0 Å</u> |             |              |             |                   |
| <b>3</b>                | <b>5.23</b> | <b>0.988</b> | <b>3.74</b> | <b>2.78</b>       |
| 2                       | 8.91        | 0.985        | 4.99        | -0.93             |
| 1                       | 9.61        | 0.984        | 5.36        | -1.84             |
| <br>                    |             |              |             |                   |
| <u>Resolution 2.2 Å</u> |             |              |             |                   |
| <b>3</b>                | <b>5.24</b> | <b>0.991</b> | <b>2.51</b> | <b>2.76</b>       |
| 2                       | 8.73        | 0.988        | 4.11        | -0.96             |
| 1                       | 10.3        | 0.989        | 4.18        | -1.8              |
| <br>                    |             |              |             |                   |
| <u>Resolution 2.5 Å</u> |             |              |             |                   |
| <b>3</b>                | <b>5.27</b> | <b>0.993</b> | <b>3.21</b> | <b>2.47</b>       |
| 2                       | 10.4        | 0.991        | 3.66        | -0.87             |
| 1                       | 8.76        | 0.99         | 4.38        | -1.6              |
| <br>                    |             |              |             |                   |
| <u>Resolution 2.8 Å</u> |             |              |             |                   |
| <b>3</b>                | <b>5.2</b>  | <b>0.99</b>  | <b>4.97</b> | <b>1.07</b>       |
| 1                       | 9.59        | 0.989        | 3.86        | 0.36              |
| 2                       | 8.47        | 0.985        | 5.48        | -1.43             |
| <br>                    |             |              |             |                   |
| <u>Resolution 3.0 Å</u> |             |              |             |                   |
| <b>3</b>                | <b>5.11</b> | <b>0.992</b> | <b>5.18</b> | <b>1.77</b>       |
| 1                       | 10.4        | 0.99         | 4.98        | -0.20             |
| 2                       | 8.34        | 0.986        | 5.98        | -1.57             |

**Table S2** Scoring results for possible tautomeric structures of the ligand 8HX in PDB 4N9S based on the QM refinement with PM6.

| <u>Structure-4N9S</u> | <u>SE</u>   | <u>RSCC</u>  | <u>ZDD</u>  | <u>XModeScore</u> |
|-----------------------|-------------|--------------|-------------|-------------------|
| <b>24</b>             | <b>4.42</b> | <b>0.961</b> | <b>16.1</b> | <b>3.87</b>       |
| 25                    | 7.01        | 0.958        | 18.1        | 2.11              |
| 18                    | 9.84        | 0.958        | 18.1        | 2.02              |
| 20                    | 5.76        | 0.958        | 18.3        | 2.01              |
| 28                    | 5.14        | 0.959        | 18.3        | 2.01              |
| 22                    | 3.76        | 0.959        | 18.3        | 2.00              |
| 30                    | 5.01        | 0.959        | 18.3        | 1.95              |
| 26                    | 7.5         | 0.958        | 18.6        | 1.66              |
| 9                     | 5.48        | 0.958        | 19.2        | 1.19              |
| 21                    | 5.19        | 0.958        | 19.3        | 1.14              |
| 14                    | 19.2        | 0.958        | 19.5        | 0.68              |
| 13                    | 12.9        | 0.958        | 19.7        | 0.62              |
| 27                    | 3.99        | 0.954        | 20.2        | 0.45              |
| 6                     | 25.9        | 0.959        | 19.8        | 0.28              |
| 5                     | 10.8        | 0.956        | 20.6        | -0.06             |
| 3                     | 74.3        | 0.959        | 19.2        | -0.19             |
| 15                    | 14.7        | 0.953        | 21          | -0.46             |
| 7                     | 95.9        | 0.96         | 19          | -0.49             |
| 29                    | 12.8        | 0.955        | 21.3        | -0.70             |
| 10                    | 112         | 0.96         | 19.1        | -0.84             |
| 1                     | 91.7        | 0.96         | 19.7        | -0.99             |
| 19                    | 123         | 0.957        | 19.6        | -1.56             |
| 23                    | 114         | 0.96         | 19.9        | -1.63             |
| 4                     | 115         | 0.957        | 20          | -1.72             |
| 8                     | 119         | 0.958        | 20          | -1.74             |
| 11                    | 104         | 0.955        | 20.6        | -1.97             |
| 2                     | 108         | 0.958        | 20.8        | -2.17             |
| 16                    | 117         | 0.956        | 20.5        | -2.19             |
| 12                    | 107         | 0.956        | 20.9        | -2.25             |
| 17                    | 100         | 0.951        | 22          | -3.04             |

**Resolution 1.4 Å**

|           |             |              |             |             |
|-----------|-------------|--------------|-------------|-------------|
| <b>24</b> | <b>4.81</b> | <b>0.967</b> | <b>11.9</b> | <b>3.82</b> |
| 20        | 5.64        | 0.965        | 13.9        | 2.09        |
| 25        | 6.87        | 0.963        | 14          | 2.03        |
| 28        | 5.23        | 0.963        | 14.1        | 1.93        |
| 22        | 4.72        | 0.962        | 14.2        | 1.88        |
| 30        | 5.06        | 0.963        | 14.2        | 1.87        |
| 26        | 7.61        | 0.963        | 14.3        | 1.70        |
| 18        | 10.6        | 0.962        | 14.3        | 1.68        |
| 21        | 4.47        | 0.963        | 14.6        | 1.51        |

|    |      |       |      |       |
|----|------|-------|------|-------|
| 9  | 6    | 0.962 | 15   | 1.17  |
| 13 | 13.3 | 0.961 | 15.4 | 0.65  |
| 27 | 4.71 | 0.958 | 15.8 | 0.51  |
| 14 | 19.1 | 0.962 | 15.6 | 0.37  |
| 15 | 12.6 | 0.959 | 15.9 | 0.27  |
| 6  | 27.3 | 0.963 | 15.8 | 0.07  |
| 5  | 10.5 | 0.96  | 16.4 | -0.10 |
| 3  | 79.4 | 0.963 | 15.3 | -0.58 |
| 7  | 95.6 | 0.965 | 14.9 | -0.60 |
| 1  | 91.2 | 0.966 | 15.2 | -0.72 |
| 10 | 112  | 0.964 | 15   | -1.01 |
| 29 | 13   | 0.957 | 17.6 | -1.20 |
| 4  | 115  | 0.963 | 15.3 | -1.29 |
| 19 | 124  | 0.963 | 15.3 | -1.51 |
| 23 | 114  | 0.963 | 15.6 | -1.57 |
| 16 | 117  | 0.962 | 15.6 | -1.61 |
| 2  | 107  | 0.964 | 15.9 | -1.68 |
| 11 | 92   | 0.96  | 16.5 | -1.86 |
| 8  | 119  | 0.962 | 16.2 | -2.13 |
| 12 | 113  | 0.961 | 16.4 | -2.22 |
| 17 | 100  | 0.954 | 18.2 | -3.47 |

**Resolution 1.6 Å**

|           |             |              |           |             |
|-----------|-------------|--------------|-----------|-------------|
| <b>24</b> | <b>5.06</b> | <b>0.969</b> | <b>10</b> | <b>3.60</b> |
| 18        | 10.2        | 0.966        | 11.6      | 2.25        |
| 21        | 5.2         | 0.966        | 12.1      | 2.01        |
| 20        | 5.42        | 0.967        | 12.1      | 1.99        |
| 25        | 8.38        | 0.965        | 12        | 1.99        |
| 30        | 4.89        | 0.964        | 12.5      | 1.68        |
| 9         | 5.11        | 0.967        | 12.6      | 1.63        |
| 28        | 5.19        | 0.965        | 12.8      | 1.42        |
| 22        | 4.64        | 0.962        | 12.9      | 1.36        |
| 26        | 6.17        | 0.964        | 13.1      | 1.24        |
| 13        | 13.4        | 0.963        | 13.4      | 0.79        |
| 27        | 4.37        | 0.961        | 13.9      | 0.60        |
| 14        | 18.9        | 0.964        | 13.6      | 0.57        |
| 15        | 14.4        | 0.96         | 14        | 0.35        |
| 6         | 25.5        | 0.963        | 13.7      | 0.32        |
| 3         | 78.1        | 0.967        | 12.9      | -0.12       |
| 5         | 10.4        | 0.959        | 14.9      | -0.28       |
| 10        | 112         | 0.968        | 12.3      | -0.37       |
| 1         | 91.9        | 0.967        | 13.3      | -0.74       |
| 29        | 13.3        | 0.957        | 15.7      | -0.95       |
| 7         | 96.5        | 0.967        | 13.6      | -1.03       |
| 4         | 115         | 0.966        | 13.3      | -1.19       |
| 2         | 108         | 0.965        | 14.1      | -1.65       |
| 11        | 92.1        | 0.963        | 14.7      | -1.78       |

|    |     |       |      |       |
|----|-----|-------|------|-------|
| 23 | 113 | 0.964 | 14.1 | -1.80 |
| 16 | 117 | 0.964 | 14.1 | -1.89 |
| 12 | 107 | 0.963 | 14.5 | -1.97 |
| 8  | 117 | 0.963 | 14.5 | -2.17 |
| 19 | 122 | 0.964 | 14.4 | -2.23 |
| 17 | 100 | 0.957 | 16.8 | -3.64 |

**Resolution 1.8 Å**

|           |            |              |            |             |
|-----------|------------|--------------|------------|-------------|
| <b>24</b> | <b>4.9</b> | <b>0.966</b> | <b>8.5</b> | <b>2.64</b> |
| 21        | 4.78       | 0.966        | 8.76       | 2.40        |
| 20        | 5.12       | 0.967        | 8.99       | 2.19        |
| 22        | 3.87       | 0.962        | 9.14       | 2.08        |
| 28        | 4.46       | 0.962        | 9.71       | 1.55        |
| 9         | 5.52       | 0.964        | 9.87       | 1.39        |
| 27        | 4.54       | 0.961        | 9.91       | 1.37        |
| 30        | 4.09       | 0.96         | 10         | 1.28        |
| 15        | 13.7       | 0.961        | 10.2       | 0.96        |
| 6         | 26.9       | 0.964        | 9.93       | 0.92        |
| 18        | 9.5        | 0.96         | 10.4       | 0.83        |
| 5         | 10.5       | 0.96         | 10.4       | 0.81        |
| 25        | 7.5        | 0.958        | 10.6       | 0.70        |
| 13        | 13.1       | 0.96         | 10.6       | 0.56        |
| 26        | 6.06       | 0.958        | 11         | 0.37        |
| 1         | 92.3       | 0.966        | 9.26       | 0.27        |
| 14        | 17.2       | 0.961        | 11.2       | 0.00        |
| 4         | 116        | 0.966        | 9.39       | -0.31       |
| 3         | 86.6       | 0.964        | 10         | -0.32       |
| 7         | 96.1       | 0.965        | 9.82       | -0.32       |
| 29        | 13.4       | 0.958        | 11.9       | -0.61       |
| 2         | 107        | 0.965        | 10.4       | -1.04       |
| 11        | 93         | 0.964        | 10.8       | -1.14       |
| 10        | 112        | 0.963        | 10.5       | -1.24       |
| 19        | 122        | 0.962        | 10.6       | -1.50       |
| 12        | 115        | 0.962        | 10.8       | -1.60       |
| 8         | 120        | 0.962        | 11.2       | -2.03       |
| 23        | 113        | 0.96         | 11.4       | -2.12       |
| 16        | 118        | 0.957        | 12         | -2.71       |
| 17        | 151        | 0.951        | 14.2       | -5.37       |

**Resolution 2.0 Å**

|           |             |              |             |             |
|-----------|-------------|--------------|-------------|-------------|
| <b>24</b> | <b>3.96</b> | <b>0.972</b> | <b>6.47</b> | <b>2.87</b> |
| 21        | 4.39        | 0.97         | 6.99        | 2.40        |
| 20        | 4.93        | 0.972        | 7.22        | 2.19        |
| 9         | 5.31        | 0.969        | 7.74        | 1.73        |
| 27        | 4.03        | 0.969        | 7.97        | 1.55        |
| 28        | 5.05        | 0.968        | 8.08        | 1.43        |
| 22        | 4.89        | 0.966        | 8.14        | 1.39        |

|    |      |       |      |       |
|----|------|-------|------|-------|
| 30 | 4.18 | 0.966 | 8.39 | 1.18  |
| 18 | 9.42 | 0.965 | 8.29 | 1.16  |
| 6  | 24.7 | 0.969 | 8.02 | 1.11  |
| 25 | 7.14 | 0.962 | 8.84 | 0.73  |
| 15 | 13.4 | 0.966 | 8.81 | 0.64  |
| 1  | 92.4 | 0.972 | 7.18 | 0.55  |
| 29 | 13.4 | 0.965 | 8.92 | 0.54  |
| 5  | 10.5 | 0.964 | 9.09 | 0.44  |
| 26 | 5.59 | 0.962 | 9.5  | 0.18  |
| 13 | 13   | 0.963 | 9.52 | 0.02  |
| 3  | 88.3 | 0.969 | 7.91 | -0.02 |
| 14 | 15.5 | 0.963 | 9.55 | -0.06 |
| 4  | 116  | 0.971 | 7.6  | -0.29 |
| 7  | 95.7 | 0.968 | 8.57 | -0.73 |
| 2  | 108  | 0.969 | 8.42 | -0.84 |
| 11 | 106  | 0.967 | 8.95 | -1.26 |
| 10 | 112  | 0.966 | 8.83 | -1.27 |
| 8  | 120  | 0.964 | 9.31 | -1.85 |
| 12 | 108  | 0.964 | 9.56 | -1.85 |
| 19 | 121  | 0.966 | 9.34 | -1.90 |
| 23 | 114  | 0.963 | 9.9  | -2.24 |
| 16 | 118  | 0.961 | 10.1 | -2.54 |
| 17 | 151  | 0.955 | 12.5 | -5.26 |

**Resolution 2.2 Å**

|           |             |              |             |             |
|-----------|-------------|--------------|-------------|-------------|
| <b>24</b> | <b>4.04</b> | <b>0.981</b> | <b>4.85</b> | <b>3.44</b> |
| 21        | 6.48        | 0.977        | 6.58        | 1.98        |
| 30        | 4.52        | 0.975        | 7.16        | 1.55        |
| 20        | 4.93        | 0.978        | 7.21        | 1.50        |
| 27        | 3.94        | 0.976        | 7.43        | 1.34        |
| 28        | 4.33        | 0.975        | 7.74        | 1.08        |
| 13        | 12.9        | 0.975        | 7.56        | 1.06        |
| 25        | 7.08        | 0.972        | 7.72        | 1.04        |
| 18        | 8.46        | 0.975        | 7.71        | 1.03        |
| 9         | 5.53        | 0.975        | 7.79        | 1.01        |
| 14        | 19.3        | 0.976        | 7.5         | 0.98        |
| 5         | 10.8        | 0.972        | 7.72        | 0.97        |
| 15        | 13.6        | 0.975        | 7.78        | 0.87        |
| 6         | 28.8        | 0.975        | 7.71        | 0.63        |
| 3         | 94.8        | 0.978        | 6.22        | 0.57        |
| 26        | 4.77        | 0.972        | 8.55        | 0.41        |
| 22        | 6.52        | 0.971        | 8.58        | 0.35        |
| 1         | 91.7        | 0.977        | 6.92        | 0.06        |
| 10        | 111         | 0.976        | 7.19        | -0.54       |
| 2         | 109         | 0.976        | 7.37        | -0.64       |
| 4         | 116         | 0.976        | 7.28        | -0.71       |
| 7         | 94.9        | 0.974        | 7.83        | -0.75       |



|    |      |       |      |       |
|----|------|-------|------|-------|
| 11 | 93.5 | 0.974 | 8.05 | -0.90 |
| 29 | 13.6 | 0.968 | 10.1 | -1.00 |
| 12 | 109  | 0.972 | 8.57 | -1.61 |
| 23 | 114  | 0.972 | 8.67 | -1.79 |
| 19 | 122  | 0.972 | 8.86 | -2.11 |
| 8  | 123  | 0.971 | 8.91 | -2.17 |
| 16 | 118  | 0.971 | 9.37 | -2.44 |
| 17 | 151  | 0.968 | 12   | -5.21 |

**Resolution 2.5 Å**

|           |             |              |             |             |
|-----------|-------------|--------------|-------------|-------------|
| <b>24</b> | <b>3.81</b> | <b>0.988</b> | <b>4.54</b> | <b>2.70</b> |
| 21        | 4.52        | 0.984        | 5.1         | 2.16        |
| 30        | 4.6         | 0.986        | 5.48        | 1.80        |
| 18        | 9.43        | 0.985        | 5.51        | 1.68        |
| 14        | 22.4        | 0.986        | 5.75        | 1.20        |
| 27        | 4.64        | 0.984        | 6.16        | 1.16        |
| 26        | 5.1         | 0.984        | 6.16        | 1.15        |
| 20        | 4.92        | 0.984        | 6.2         | 1.12        |
| 13        | 12.6        | 0.985        | 6.05        | 1.11        |
| 15        | 12.3        | 0.984        | 6.12        | 1.05        |
| 6         | 31.8        | 0.985        | 5.79        | 0.98        |
| 9         | 5.17        | 0.982        | 6.39        | 0.94        |
| 25        | 6.98        | 0.983        | 6.42        | 0.88        |
| 3         | 94.1        | 0.986        | 4.76        | 0.72        |
| 23        | 17.7        | 0.983        | 6.4         | 0.68        |
| 28        | 4.64        | 0.984        | 6.74        | 0.62        |
| 5         | 11          | 0.983        | 6.78        | 0.46        |
| 29        | 13.4        | 0.98         | 6.84        | 0.36        |
| 1         | 90.4        | 0.984        | 5.29        | 0.29        |
| 22        | 6.34        | 0.979        | 7.57        | -0.19       |
| 10        | 113         | 0.984        | 6.15        | -0.96       |
| 4         | 114         | 0.984        | 6.39        | -1.19       |
| 2         | 107         | 0.983        | 6.53        | -1.20       |
| 8         | 122         | 0.983        | 6.54        | -1.51       |
| 11        | 92.8        | 0.984        | 7.19        | -1.53       |
| 7         | 94.3        | 0.982        | 7.21        | -1.59       |
| 12        | 110         | 0.983        | 7.56        | -2.23       |
| 16        | 118         | 0.982        | 7.7         | -2.51       |
| 19        | 123         | 0.983        | 7.75        | -2.67       |
| 17        | 150         | 0.979        | 10.2        | -5.48       |

**Resolution 2.8 Å**

|           |          |             |             |             |
|-----------|----------|-------------|-------------|-------------|
| <b>24</b> | <b>4</b> | <b>0.99</b> | <b>2.73</b> | <b>3.01</b> |
| 30        | 4.99     | 0.986       | 3.61        | 2.07        |
| 26        | 5.1      | 0.984       | 3.75        | 1.93        |
| 14        | 27.8     | 0.983       | 3.53        | 1.72        |

|    |      |       |      |       |
|----|------|-------|------|-------|
| 13 | 12.3 | 0.984 | 4.09 | 1.44  |
| 25 | 6.79 | 0.983 | 4.21 | 1.42  |
| 15 | 13.3 | 0.986 | 4.22 | 1.29  |
| 18 | 8.63 | 0.983 | 4.35 | 1.25  |
| 21 | 4.61 | 0.982 | 4.64 | 1.02  |
| 6  | 33.5 | 0.983 | 4.11 | 1.01  |
| 27 | 3.73 | 0.985 | 5.16 | 0.50  |
| 5  | 10.3 | 0.983 | 5.2  | 0.33  |
| 28 | 4.05 | 0.982 | 5.48 | 0.17  |
| 9  | 4.97 | 0.981 | 5.48 | 0.14  |
| 22 | 3.19 | 0.978 | 5.8  | -0.15 |
| 3  | 92.4 | 0.983 | 4.15 | -0.17 |
| 10 | 113  | 0.985 | 3.77 | -0.19 |
| 23 | 104  | 0.984 | 4.05 | -0.30 |
| 20 | 5.01 | 0.983 | 5.92 | -0.32 |
| 7  | 96.4 | 0.981 | 4.49 | -0.60 |
| 2  | 108  | 0.984 | 4.35 | -0.68 |
| 12 | 110  | 0.984 | 4.33 | -0.69 |
| 29 | 12.9 | 0.98  | 6.18 | -0.73 |
| 16 | 117  | 0.983 | 4.26 | -0.75 |
| 1  | 90.6 | 0.982 | 4.92 | -0.94 |
| 11 | 105  | 0.985 | 5.01 | -1.31 |
| 19 | 124  | 0.983 | 4.78 | -1.44 |
| 4  | 114  | 0.985 | 5.5  | -1.99 |
| 8  | 121  | 0.981 | 5.41 | -2.03 |
| 17 | 150  | 0.978 | 7.77 | -5.03 |

**Resolution 3.0 Å**

|           |             |              |             |             |
|-----------|-------------|--------------|-------------|-------------|
| <b>24</b> | <b>3.71</b> | <b>0.988</b> | <b>2.49</b> | <b>3.19</b> |
| 13        | 12.2        | 0.985        | 3.42        | 2.09        |
| 5         | 9.62        | 0.985        | 3.52        | 2.04        |
| 26        | 5.63        | 0.985        | 3.74        | 1.89        |
| 30        | 4.99        | 0.985        | 3.82        | 1.82        |
| 14        | 32          | 0.986        | 3.39        | 1.74        |
| 15        | 13.5        | 0.987        | 3.9         | 1.58        |
| 29        | 4.16        | 0.985        | 4.16        | 1.50        |
| 18        | 9.38        | 0.983        | 4.1         | 1.45        |
| 25        | 7.02        | 0.983        | 4.31        | 1.29        |
| 28        | 4.04        | 0.987        | 4.61        | 1.04        |
| 22        | 3.3         | 0.982        | 4.88        | 0.80        |
| 6         | 35.2        | 0.986        | 4.39        | 0.66        |
| 21        | 4.73        | 0.981        | 4.99        | 0.65        |
| 9         | 5.28        | 0.982        | 5.25        | 0.38        |
| 20        | 4.9         | 0.985        | 5.54        | 0.10        |

|    |      |       |      |       |
|----|------|-------|------|-------|
| 27 | 3.89 | 0.985 | 5.57 | 0.09  |
| 3  | 93.8 | 0.983 | 4.06 | -0.13 |
| 7  | 96.6 | 0.984 | 4.81 | -0.94 |
| 10 | 112  | 0.983 | 4.58 | -1.00 |
| 8  | 122  | 0.986 | 4.56 | -1.17 |
| 23 | 114  | 0.984 | 4.98 | -1.44 |
| 1  | 90.5 | 0.982 | 5.44 | -1.45 |
| 12 | 110  | 0.985 | 5.21 | -1.59 |
| 19 | 121  | 0.986 | 5    | -1.61 |
| 16 | 118  | 0.983 | 5.08 | -1.62 |
| 2  | 109  | 0.982 | 5.43 | -1.79 |
| 11 | 103  | 0.985 | 5.95 | -2.20 |
| 4  | 113  | 0.985 | 5.94 | -2.39 |
| 17 | 149  | 0.979 | 7.82 | -4.97 |

**Table S3** Scoring results for possible tautomeric structures of the ligand 8HX in PDB 4N9S based on the QM refinement with AM1.

| <u>Structure-4N9S</u> | <u>SE</u> | <u>RSCC</u> | <u>ZDD</u> | <u>XModeScore</u> |
|-----------------------|-----------|-------------|------------|-------------------|
| 24                    | 5.44      | 0.962       | 16         | 3.74              |
| 22                    | 3.28      | 0.960       | 17.9       | 2.01              |
| 29                    | 5.7       | 0.960       | 18.6       | 1.22              |
| 28                    | 3.07      | 0.954       | 18.8       | 1.14              |
| 21                    | 3.87      | 0.959       | 18.8       | 1.06              |
| 26                    | 4.75      | 0.957       | 18.9       | 0.93              |
| 30                    | 2.98      | 0.956       | 19         | 0.90              |
| 6                     | 8.55      | 0.962       | 18.9       | 0.86              |
| 25                    | 9.86      | 0.955       | 18.8       | 0.84              |
| 14                    | 5.2       | 0.960       | 19         | 0.82              |
| 20                    | 5.19      | 0.951       | 19.1       | 0.70              |
| 18                    | 6.44      | 0.953       | 19.2       | 0.57              |
| 13                    | 7.97      | 0.959       | 19.2       | 0.53              |
| 7                     | 7.25      | 0.960       | 19.3       | 0.46              |
| 9                     | 6.41      | 0.955       | 19.4       | 0.42              |
| 16                    | 9.44      | 0.959       | 19.3       | 0.36              |
| 19                    | 7.89      | 0.957       | 19.6       | 0.15              |
| 5                     | 8.85      | 0.960       | 19.6       | 0.11              |
| 3                     | 7.61      | 0.958       | 19.7       | 0.09              |
| 1                     | 7.36      | 0.960       | 19.7       | 0.02              |
| 4                     | 6.06      | 0.956       | 20.1       | -0.24             |
| 27                    | 3.5       | 0.952       | 20.2       | -0.32             |
| 10                    | 10.3      | 0.958       | 20         | -0.32             |
| 17                    | 13        | 0.956       | 20.1       | -0.50             |
| 15                    | 9.06      | 0.956       | 20.2       | -0.51             |
| 8                     | 8.97      | 0.954       | 21.3       | -1.56             |
| 2                     | 12.9      | 0.957       | 21.3       | -1.71             |
| 23                    | 87.8      | 0.958       | 19.5       | -2.83             |
| 12                    | 98.2      | 0.959       | 20.3       | -4.00             |
| 11                    | 93.7      | 0.952       | 21.4       | -4.93             |

**Table S4** Scoring results for possible tautomeric structures of the ligand 8HX in PDB 4N9S based on the **conventional** (no QM) Phenix refinement with eLBOW AM1 CIF.

| <u>Structure-4N9S</u> | <u>SE</u>   | <u>RSCC</u>  | <u>ZDD</u>  | <u>XModeScore</u> |
|-----------------------|-------------|--------------|-------------|-------------------|
| 25                    | 14.8        | 0.960        | 17.4        | 2.55              |
| 20                    | 10.7        | 0.957        | 18          | 2.52              |
| 22                    | 22.1        | 0.964        | 16.4        | 2.32              |
| <b>24</b>             | <b>19.5</b> | <b>0.959</b> | <b>17.2</b> | <b>1.98</b>       |
| 30                    | 14.9        | 0.959        | 18.3        | 1.67              |
| 26                    | 14.4        | 0.958        | 18.5        | 1.56              |
| 1                     | 12.5        | 0.964        | 18.9        | 1.48              |
| 21                    | 20.6        | 0.962        | 17.7        | 1.31              |
| 18                    | 16.7        | 0.959        | 18.5        | 1.18              |
| 5                     | 23.4        | 0.966        | 17.4        | 1.17              |
| 14                    | 12.3        | 0.962        | 19.4        | 1.01              |
| 23                    | 8.27        | 0.957        | 20.3        | 0.74              |
| 16                    | 20.2        | 0.961        | 18.9        | 0.32              |
| 3                     | 21.8        | 0.963        | 18.9        | 0.02              |
| 29                    | 29.8        | 0.963        | 17.8        | -0.14             |
| 13                    | 21.5        | 0.959        | 19.1        | -0.15             |
| 27                    | 19.4        | 0.955        | 19.7        | -0.32             |
| 9                     | 25.1        | 0.961        | 18.8        | -0.39             |
| 7                     | 27.7        | 0.964        | 18.7        | -0.73             |
| 10                    | 23.1        | 0.962        | 19.6        | -0.83             |
| 17                    | 21.2        | 0.960        | 19.9        | -0.85             |
| 4                     | 21          | 0.960        | 20.1        | -0.93             |
| 28                    | 26.3        | 0.955        | 19.3        | -0.99             |
| 6                     | 29          | 0.965        | 19.1        | -1.26             |
| 2                     | 26.9        | 0.964        | 19.5        | -1.29             |
| 15                    | 22.8        | 0.957        | 20.3        | -1.40             |
| 12                    | 30.4        | 0.964        | 19.8        | -2.15             |
| 8                     | 35.1        | 0.965        | 19.2        | -2.32             |
| 11                    | 29.5        | 0.958        | 20.9        | -3.02             |
| 19                    | 31.2        | 0.957        | 20.7        | -3.05             |

**Table S5** Scoring results for possible tautomeric structures of the ligand 8HX in PDB 4N9S based on the **conventional** (no QM) Phenix refinement with **Mogul** CIF.

| <u>Structure-4N9S</u> | <u>SE</u>   | <u>RSCC</u> | <u>ZDD</u>  | <u>XModeScore</u> |
|-----------------------|-------------|-------------|-------------|-------------------|
| 26                    | 17.7        | 0.967       | 16.9        | 4.60              |
| 22                    | 17.3        | 0.965       | 20.6        | 2.39              |
| 25                    | 17.3        | 0.962       | 20          | 2.78              |
| 21                    | 17.8        | 0.965       | 21.4        | 1.85              |
| <b>24</b>             | <b>14.9</b> | <b>0.96</b> | <b>22.5</b> | <b>1.60</b>       |
| 28                    | 20.1        | 0.959       | 22.2        | 1.01              |
| 9                     | 23          | 0.965       | 22.1        | 0.63              |
| 5                     | 24.4        | 0.967       | 21.3        | 0.95              |
| 30                    | 23.2        | 0.963       | 21.7        | 0.89              |
| 27                    | 18.3        | 0.959       | 23.1        | 0.72              |
| 2                     | 23.3        | 0.968       | 23          | 0.06              |
| 14                    | 17.3        | 0.963       | 23.4        | 0.66              |
| 1                     | 22.2        | 0.967       | 23.2        | 0.11              |
| 17                    | 21.6        | 0.964       | 23.2        | 0.20              |
| 23                    | 23.7        | 0.964       | 23          | 0.03              |
| 20                    | 24.1        | 0.96        | 23.7        | -0.46             |
| 18                    | 32.3        | 0.963       | 21.4        | -0.27             |
| 13                    | 30.9        | 0.966       | 21.5        | -0.09             |
| 6                     | 29.1        | 0.967       | 23          | -0.76             |
| 7                     | 26.6        | 0.965       | 23.7        | -0.84             |
| 29                    | 35.8        | 0.966       | 21.8        | -1.01             |
| 3                     | 29.4        | 0.965       | 22.7        | -0.63             |
| 4                     | 23.1        | 0.963       | 24.8        | -1.03             |
| 16                    | 26.6        | 0.963       | 23.5        | -0.74             |
| 19                    | 25.1        | 0.961       | 25.2        | -1.56             |
| 10                    | 30.9        | 0.964       | 23.8        | -1.53             |
| 8                     | 40.3        | 0.967       | 22.5        | -2.09             |
| 15                    | 33.9        | 0.962       | 24          | -2.05             |
| 11                    | 30.3        | 0.963       | 25.5        | -2.44             |
| 12                    | 43.2        | 0.967       | 23.3        | -3.00             |

**Table S6** Scoring results for possible tautomeric structures of the ligand AZM in PDB 3HS4 based on the **QM** refinement with AM1.

| <u>Structure- 3HS4</u>         | <u>SE</u>   | <u>RSCC</u>  | <u>ZDD</u>  | <u>XModeScore</u> |
|--------------------------------|-------------|--------------|-------------|-------------------|
| <b>3</b>                       | <b>17.9</b> | <b>0.985</b> | <b>17.7</b> | <b>2.53</b>       |
| 2                              | 18.7        | 0.977        | 27.3        | -0.58             |
| 1                              | 20.1        | 0.977        | 26.8        | -1.95             |
| <b><u>Resolution 1.6 Å</u></b> |             |              |             |                   |
| <b>3</b>                       | <b>18.3</b> | <b>0.988</b> | <b>5.88</b> | <b>2.37</b>       |
| 2                              | 18.9        | 0.983        | 10.2        | 0.13              |
| 1                              | 20.4        | 0.979        | 12.0        | -2.39             |

**Table S7** Scoring results for possible tautomeric structures of the ligand AZM in PDB 3HS4 based on the **conventional** (no QM) Phenix refinement with eLBOW AM1 CIF.

| <u>Structure- 3HS4</u>         | <u>SE</u>   | <u>RSCC</u>  | <u>ZDD</u>  | <u>XModeScore</u> |
|--------------------------------|-------------|--------------|-------------|-------------------|
| <b>3</b>                       | <b>20.0</b> | <b>0.989</b> | <b>17.5</b> | <b>1.98</b>       |
| 1                              | 35.9        | 0.988        | 17.7        | -0.75             |
| 2                              | 26.2        | 0.994        | 18.9        | -1.23             |
| <b><u>Resolution 1.6 Å</u></b> |             |              |             |                   |
| 2                              | 21.7        | 0.993        | 5.72        | 1.61              |
| <b>3</b>                       | <b>17.6</b> | <b>0.989</b> | <b>6.11</b> | <b>0.36</b>       |
| 1                              | 28.4        | 0.989        | 6.09        | -1.97             |

**Table S8** Scoring results for possible tautomeric structures of the ligand AZM in PDB 3HS4 based on the **conventional** (no QM) Phenix refinement with Mogul CIF.

| <u>Structure- 3HS4</u>         | <u>SE</u>   | <u>RSCC</u>  | <u>ZDD</u>  | <u>XModeScore</u> |
|--------------------------------|-------------|--------------|-------------|-------------------|
| <b>3</b>                       | <b>18.9</b> | <b>0.988</b> | <b>12.4</b> | <b>2.19</b>       |
| 2                              | 19.9        | 0.991        | 14          | -0.22             |
| 1                              | 32.3        | 0.991        | 13.8        | -1.97             |
| <b><u>Resolution 1.6 Å</u></b> |             |              |             |                   |
| 2                              | 18.8        | 0.992        | 5.72        | 0.87              |
| 1                              | 30.1        | 0.992        | 5.38        | -0.32             |
| <b>3</b>                       | <b>18.1</b> | <b>0.988</b> | <b>6.33</b> | <b>-0.55</b>      |

**Table S9** Scoring results for possible tautomeric structures of ASP215 in PDB 2JJJ based on the **conventional** (no QM) Phenix refinement with eLBOW CIF for ligand 0QS.

| <u>Structure- 2JJJ</u> | <u>SE</u>   | <u>RSCC</u>  | <u>ZDD</u>  | XModeScore  |
|------------------------|-------------|--------------|-------------|-------------|
| <b>1</b>               | <b>47.3</b> | <b>0.993</b> | <b>2.72</b> | <b>0.12</b> |
| 2                      | 44.9        | 0.991        | 4.06        | -0.04       |
| 3                      | 48.6        | 0.993        | 2.23        | -0.09       |

**Table S10** Scoring results for possible tautomeric structures of ASP215 in PDB 2JJJ based on the **conventional** (no QM) Phenix refinement with Mogul CIF for ligand 0QS.

| <u>Structure- 2JJJ</u> | <u>SE</u>   | <u>RSCC</u>  | <u>ZDD</u>  | XModeScore  |
|------------------------|-------------|--------------|-------------|-------------|
| <b>1</b>               | <b>46.6</b> | <b>0.993</b> | <b>2.66</b> | <b>0.31</b> |
| 2                      | 44.9        | 0.991        | 4.08        | -0.12       |
| 3                      | 48.3        | 0.993        | 2.07        | -0.19       |
